# Supplementary material for: Impact of Caloric Restriction in Breast Cancer Patients Treated with Neoadjuvant Chemotherapy: A Prospective Case Control Study
Source: MDPI journal article supplement (doi:10.3390/nu15214677), 2023-11-04
Supplement: s1 [file s1]

**Supplementary Table S1:** protein synthesis parameters

|                       | TOT.<br>PR.<br>T0 | TOT.<br>PR. T1 | TOT.<br>PR. T2 | ALBUMIN<br>T0 | ALBUMIN<br>T1 | ALBUMIN<br>T2 | TRANSFERRIN<br>T0 | TRANSFERRIN<br>T1 | TRANSFERRIN<br>T2 |
|-----------------------|-------------------|----------------|----------------|---------------|---------------|---------------|-------------------|-------------------|-------------------|
| N°                    | 34                | 32             | 16             | 34            | 32            | 15            | 33                | 31                | 17                |
| Missing               | 11                | 13             | 29             | 11            | 13            | 30            | 12                | 14                | 28                |
| Mean                  | 6.75              | 6.70           | 6.62           | 4.39          | 4.44          | 4.23          | 241               | 244               | 249               |
| Median                | 6.80              | 6.65           | 6.70           | 4.50          | 4.50          | 4.20          | 242               | 226               | 238               |
| Standard<br>deviation | 0.388             | 0.385          | 0.392          | 0.305         | 0.296         | 0.249         | 44.2              | 47.4              | 44.5              |
| Minimum               | 5.90              | 5.90           | 5.70           | 3.80          | 3.90          | 3.90          | 168               | 170               | 184               |
| Maximum               | 7.40              | 7.40           | 7.20           | 4.90          | 5.00          | 4.90          | 342               | 354               | 321               |

**Supplementary Table S2:** blood concentration of C-reactive protein

|                    | CRP T0 | CRP T1 | CRP T2 |
|--------------------|--------|--------|--------|
| N                  | 33     | 31     | 15     |
| Missing            | 12     | 14     | 30     |
| Mean               | 5.41   | 2.83   | 1.81   |
| Median             | 2.10   | 1.30   | 0.500  |
| Standard deviation | 7.03   | 3.77   | 2.45   |
| Minimum            | 0.300  | 0.300  | 0.100  |
| Maximum            | 29.1   | 17.6   | 7.60   |
